# Supplementary material for: Visual specific luminescent probing of hybrid G-quadruplex DNA by a ruthenium polypyridyl complex
Source: Royal Society of Chemistry journal article supplement (doi:10.1039/c2cc36039j), 2012-01-01
Supplement: c2cc36039j.pdf [file c2cc36039j.pdf]

## Supporting Information

# Visual specific luminescent probing of hybrid G-quadruplex DNA by a ruthenium polypyridyl complex

Guo-Liang Liao, Xiang Chen, Liang-Nian Ji and Hui Chao\*

MOE Key Laboratory of Bioinorganic and Synthetic Chemistry, State Key Laboratory of Optoelectronic Materials and Technologies, School of Chemistry and Chemical Engineering, Sun Yat-Sen University, Guangzhou 510275, P. R. China.  
E-mail: [ceschh@mail.sysu.edu.cn](mailto:ceschh@mail.sysu.edu.cn); Fax: 86-20-84112245; Tel: 86-20-84110613

### Experimental Procedures

#### Materials

All of the oligonucleotides were purchased from Sangon Biotech (Shanghai, China) and used without further purification. Samples are prepared in different buffers as described in the references: buffer A (Na<sup>+</sup> buffer: 100 mM NaCl, 10 mM NaH<sub>2</sub>PO<sub>4</sub>/Na<sub>2</sub>HPO<sub>4</sub>, 1 mM Na<sub>2</sub>EDTA, pH = 7.0), buffer B (K<sup>+</sup> buffer: 100 mM KCl, 10 mM NaH<sub>2</sub>PO<sub>4</sub>/Na<sub>2</sub>HPO<sub>4</sub>, 1 mM Na<sub>2</sub>EDTA, pH = 7.0) and buffer C (100 mM KCl, 10 mM NaH<sub>2</sub>PO<sub>4</sub>/Na<sub>2</sub>HPO<sub>4</sub>, 1 mM Na<sub>2</sub>EDTA, pH = 5.5).

**Table S1.** DNA sequence introduced in the experiment

| Sequences                                             | Abb.                                                            | Expected conformations | Ref. |
|-------------------------------------------------------|-----------------------------------------------------------------|------------------------|------|
| 5'-AGGGTTAGGGTTAGGGTTAGGG-3'                          | AG <sub>3</sub> (T <sub>2</sub> AG <sub>3</sub> ) <sub>3</sub>  | antiparallel/mix       | 1    |
| FAM-5'-AGGGTTAGGGTTAGGGTTAGGG-3'-TRAMA                | F22T                                                            |                        |      |
| 5'-TGGGGTTGGGGTTGGGGTTGGGGT-3'                        | d(TG <sub>4</sub> T) <sub>4</sub>                               | parallel               | 2    |
| 5'-CCCTAACCCCTAACCCCTAACCCCT-3'                       | (C <sub>3</sub> TA <sub>2</sub> ) <sub>3</sub> C <sub>3</sub> T | i-motif                | 3    |
| 5'-AAAAAAAAAAAAAAAA-3'                                | polyd(A)                                                        | single strand          |      |
| 5'-TTTTTTTTTTTTTTT-3'                                 | polyd(T)                                                        | single strand          |      |
| 5'-AAAAAAAAAAAAAAAA-3' and<br>2*5'-TTTTTTTTTTTTTTT-3' | polyd(A)<br>·2polyd(T)                                          | triplex                | 4    |
| 5'-ATATATATATAT-3' and the complementary strand       | poly(AT)                                                        | duplex                 |      |
| 5'-GCGCGCGCGCGC-3' and the complementary strand       | poly(GC)                                                        | duplex                 |      |
| CT-DNA                                                | CT-DNA                                                          | duplex                 |      |

**General Methods.** Elemental analyses (C, H, and N) were carried out on a Vario EL elemental analyzer. <sup>1</sup>H NMR spectra were recorded on a Varian INOVA-500 spectrometer with (CD<sub>3</sub>)<sub>2</sub>SO as solvent at room temperature and tetramethylsilane (TMS) as the internal standard. All chemical shifts are given relative to TMS. Electrospray mass spectra (ES-MS) were recorded on a LCQ system (Finnigan MAT, USA) and the quoted *m/z* values are for the major peaks in the isotope distribution.

**Luminescent detection.** Ru(II) complex (50 μM) and DNAs (20 μM) were mixed and

after 4 h for equilibrium, luminescent spectra were detected by Perkin Elmer LS55 Spectrofluorometer from 500 to 800 nm, the excitation wavelength was 415 nm.

**Circular Dichroic experiment.** CD spectra were measured using a JASCO J-810 spectropolarimeter, The samples of DNAs were diluted to 10  $\mu\text{M}$  and placed in a 1 cm path length quartz cell, then different concentrations of the Ru(II) complex were added. CD spectra were then baseline-corrected and recorded from 200 to 400 nm.

**FRET melting assay.** This was performed with a Roche Lightcycler 2.0 real-time fluorescent quantitative PCR machine. In a 25  $\mu\text{L}$  volume system, 200 nM DNA F22T was added together with different concentrations of the Ru(II) complex. The experiments were performed in the machine following the procedure of 37°C for 2 min, then an increase speed of 1°C every minute from 37 to 95°C. During the procedure we measured the FAM after each step.

**Visualization experiment.** 50  $\mu\text{M}$  of the Ru(II) complex was mixed with 20  $\mu\text{M}$  DNAs and incubated for 4 h. The total volume of each sample was 600  $\mu\text{L}$ . Then all the samples were photographed under irradiation of UV light.

**Dialyze assay.** 50  $\mu\text{L}$  different DNAs (20  $\mu\text{M}$ ) were added into 3500 MWCO Thermo Slide-A-Lyzer® MINI Dialysis Units, then placed into a 1  $\mu\text{M}$  Ru(II) complex environment. After 6 h of equilibration, the units were removed and 10% SDS was added until it reached a concentration of 1%. Agilent Technologies 7700 Series ICP-MS was introduced to quantify the amount of Ru(II) complex in the units as well as dialyzate. The bound complex can be calculated as the difference of the two concentrations.

**Fluorescence polarization anisotropy.** The experiment was performed as described in reference<sup>5</sup>. 20  $\mu\text{M}$  of the Ru(II) complex was mixed with 320  $\mu\text{M}$  DNAs and incubated for 4 h. The total volume of every sample was 800  $\mu\text{L}$ . Then the samples were excited at 415 nm and the fluorescence signal was monitored at 600 nm through crossed polarizers.

### Synthesis of Ru(II) complex

Compounds  $[\text{Ru}(\text{bpy})_2(1,10\text{-phenanthroline-5,6-diamine})]^{2+}$ <sup>6</sup> and 3,4-benzo[a]phenazine quinone<sup>7</sup> were prepared as described previously.

#### Synthesis of $[\text{Ru}(\text{bpy})_2(\text{bqdppz})](\text{ClO}_4)_2$ (1).

A mixture of  $[\text{Ru}(\text{bpy})_2(1,10\text{-phenanthroline-5,6-diamine})]^{2+}$  (0.411 g, 0.5 mmol) and 3,4-benzo[a]phenazine quinone (0.130 g, 0.5 mmol) was suspended in 30 mL of acetic acid, the solution was then heated at 135 °C for 4 h under Ar. It was cooled to room temperature, and 50  $\text{cm}^3$  water were added. After filtration, a dark red precipitate was obtained by dropwise addition of aqueous  $\text{NaClO}_4$  solution. The product was purified by column chromatography on alumina with acetonitrile-toluene (1:1 v/v) as eluent. Yield: 62%. Anal. Calc.  $\text{C}_{48}\text{H}_{30}\text{Cl}_2\text{N}_{10}\text{O}_8\text{Ru}$ : C, 55.07; H, 2.89; N, 13.38%. Found: C,

54.93; H, 3.03; N, 13.18%. ES-MS [ $\text{CH}_3\text{CN}$ ,  $m/z$ ]: 423.9 ( $[\text{M}-2\text{ClO}_4]^{2+}$ ).  $^1\text{H}$  NMR (500 MHz,  $d_6$ -DMSO):  $\delta$  9.92 (d,  $J = 8$  Hz, 1H), 9.77 (d,  $J = 8$  Hz, 1H), 9.51 (d,  $J = 6$  Hz, 1H), 9.29 (d,  $J = 6$  Hz, 1H), 8.93 – 8.87 (m, 4H), 8.52 (t,  $J = 5$  Hz, 1H), 8.41 (t,  $J = 5$  Hz, 1H), 8.33 (t,  $J = 5$  Hz, 2H), 8.27 (t,  $J = 5$  Hz, 2H), 8.17 – 8.05 (m, 8H), 7.90 (d,  $J = 6$  Hz, 3H), 7.82 (d,  $J = 5$  Hz, 1H), 7.65 (t,  $J = 4.5$  Hz, 2H), 7.43 (dd,  $J_1 = 5$  Hz,  $J_2 = 3$  Hz, 2H).

## ES MS Spectrum

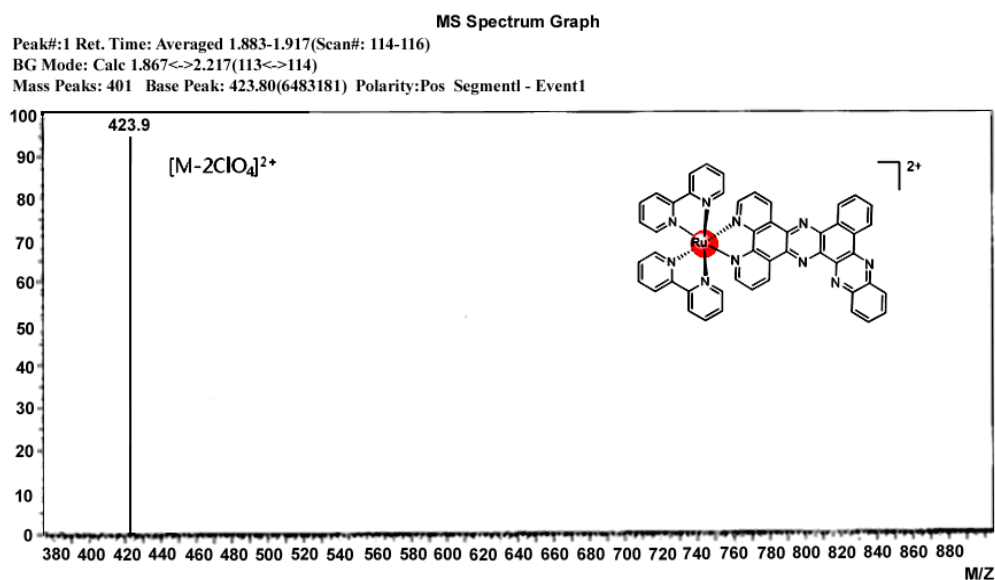

Fig. S1 ES-MS Spectrum of complex 1

## $^1\text{H}$ NMR Spectrum

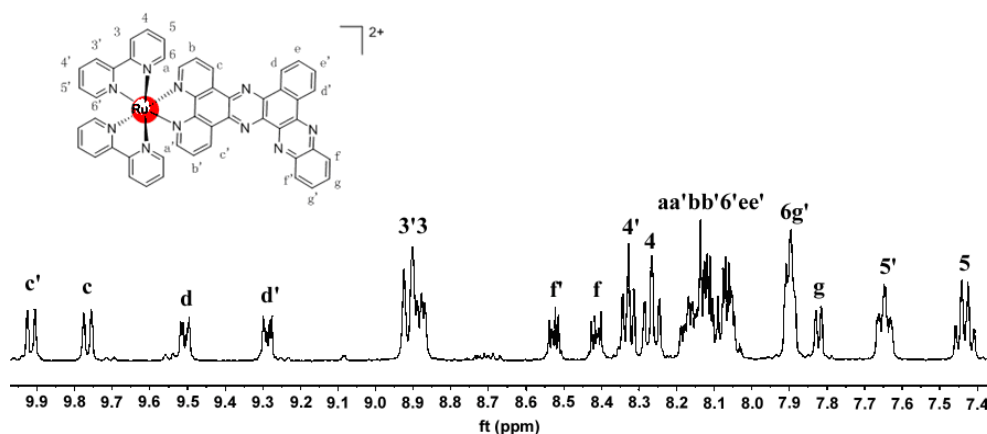

Fig. S2  $^1\text{H}$  NMR Spectrum of complex 1 in  $\text{DMSO}-d_6$

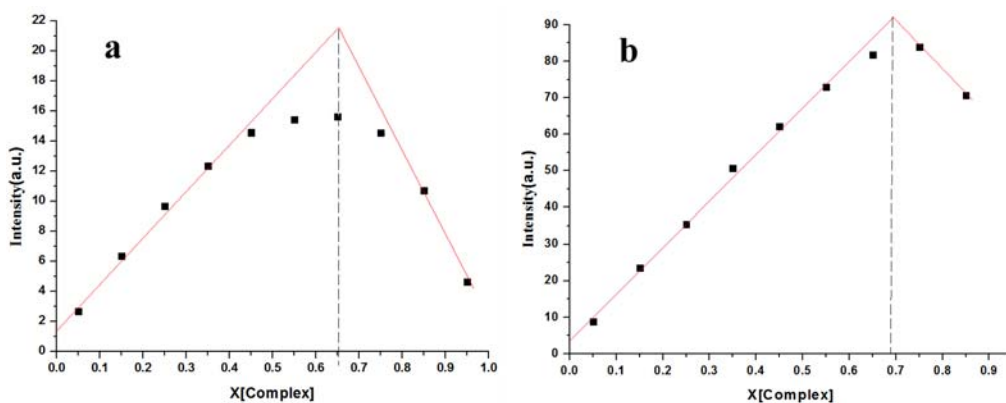

**Fig. S3** Job-Plot using luminescence data for complex **1** with  $AG_3(T_2AG_3)_3$  in  $Na^+$  buffer (a) and  $K^+$  buffer (b), X = mole fraction of Ru(II) complex added to DNA, and the total concentration was maintained at  $10 \mu M$ .

The result shows that binding stoichiometries of complex **1** with G-quadruplex is 2:1. We propose that complex **1** interacts with G-quadruplex through a stacking mode, which means the molecules stack on the top and bottom G-tetrad of the quadruplex.

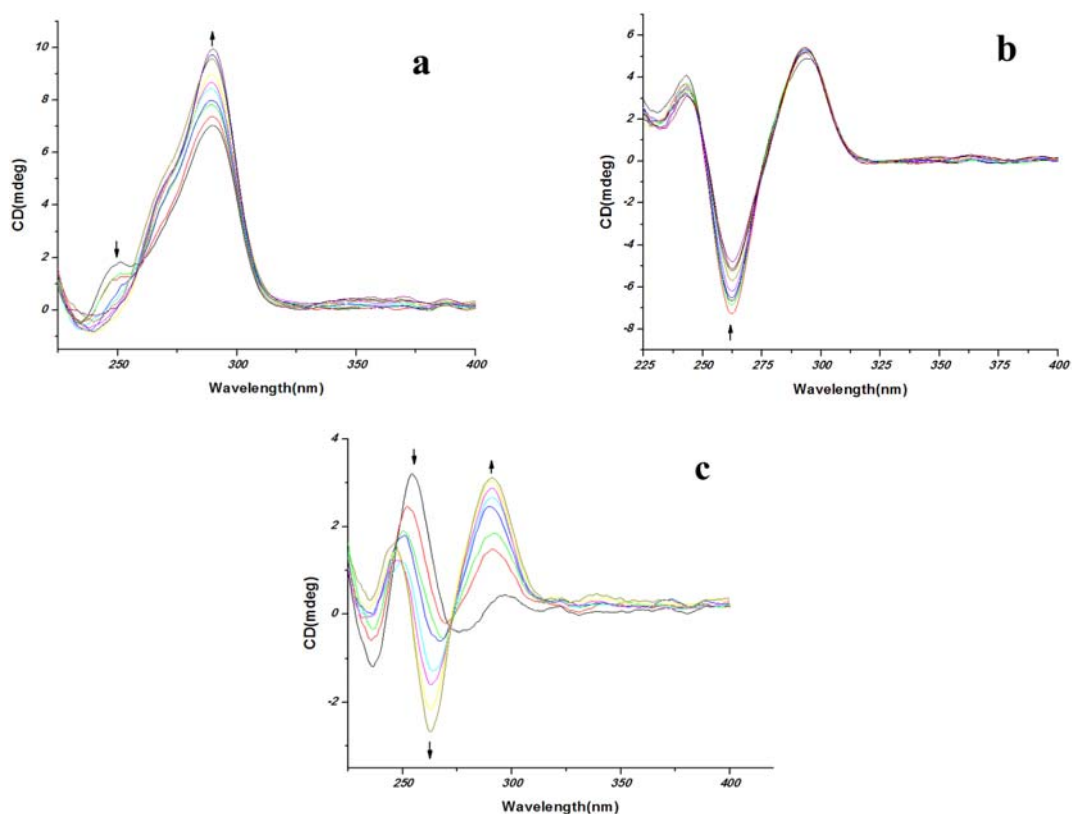

**Fig. S4** CD spectra of  $AG_3(T_2AG_3)_3$  in  $K^+$  buffer (a),  $Na^+$  buffer (b) and  $H_2O$  (c) upon increasing addition of complex. Arrows indicate the increasing concentrations of complex. The concentration of G-quadruplex was  $10 \mu M$ .

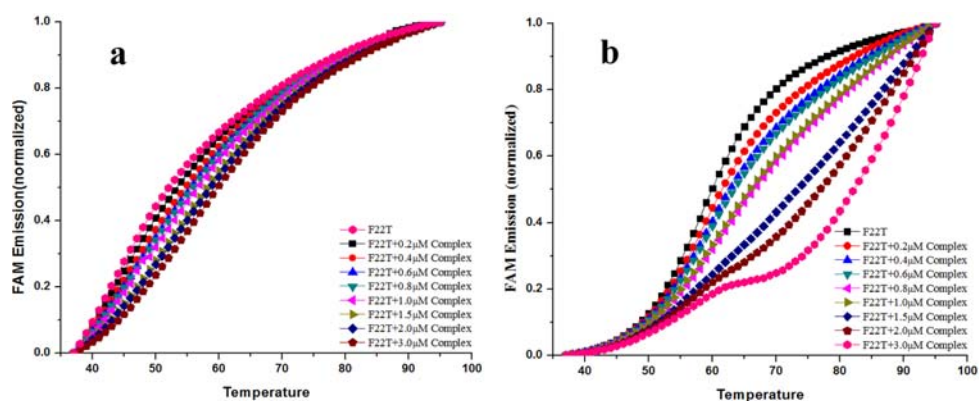

**Fig. S5** FRET melting curves detected with G-quadruplex DNA F22T (sequence: FAM-AG<sub>3</sub>(T<sub>2</sub>AG<sub>3</sub>)<sub>3</sub>-TRAMA, mimicking the human telomeric repeat) alone and different concentrations of complex **1** (0.2, 0.4, 0.6, 0.8, 1.0, 1.5, 2.0, 3.0  $\mu$ M) in Na<sup>+</sup> buffer (a), K<sup>+</sup> buffer (b), the concentration of G-quadruplex is 200 nM.

## Reference

1. K. N. Luu, A. T. Phan, V. Kuryavyi, L. Lacroix and D. J. Patel, *J. Am. Chem. Soc.*, 2006, **128**, 9963.
2. I. N. Rujan, J. C. Meleney and P. H. Bolton, *Nucleic Acids Res.*, 2005, **33**, 2022.
3. X. Li, Y. H. Peng, J. S. Ren and X. G. Qu, *Proc. Natl. Acad. Sci. U. S. A.*, 2006, **103**, 19658.
4. P. A. Rachwal, T. Brown and K. R. Fox, *Biochemistry*, 2007, **46**, 3036.
5. C. V. Kumar, J. K. Barton and N. J. Turro, *J. Am. Chem. Soc.*, 1985, **107**, 5518.
6. S. Bodige and F. M. MacDonnell, *Tetrahedron Lett.*, 1997, **38**, 8159.
7. B. M. Zeglis and J. K. Barton, *Nature Protocols*, 2007, **2**, 357.
